# Supplementary material for: Novel six-gene prognostic signature based on colon adenocarcinoma immune-related genes
Source: Research Square preprint supplement (doi:10.21203/rs.3.rs-1601528/v1), 2022-05-10
Supplement: Supplementary file 1 [file 351a6543ccff211c0560db9f.xls]

Table 1. Regulatory relationship between DEIGs and DETFs
TF	immuneGene	cor	pvalue	Regulation	TF	immuneGene	cor	pvalue	Regulation
CBX7	PTGDS	0.541649913	2.29E-35	postive	IKZF1	PTGDS	0.623094409	2.52E-49	postive
CBX7	NGFR	0.532309877	5.33E-34	postive	IKZF1	BACH2	0.57258098	3.28E-40	postive
FOSL1	PMAIP1	0.609141907	1.21E-46	postive	IKZF1	CCL19	0.615895884	6.34E-48	postive
FOXP3	CD1B	0.584563373	3.14E-42	postive	IKZF1	CCR7	0.730012234	2.09E-75	postive
FOXP3	PLCG2	0.522096044	1.49E-32	postive	IKZF1	CD79B	0.653093668	1.42E-55	postive
FOXP3	IL16	0.580176071	1.76E-41	postive	IKZF1	CD19	0.642002097	3.50E-53	postive
FOXP3	C1QC	0.602715692	1.88E-45	postive	IKZF1	CD22	0.588717003	6.00E-43	postive
FOXP3	C1QB	0.588192647	7.40E-43	postive	IKZF1	PLCG2	0.738171503	6.45E-78	postive
FOXP3	C1QA	0.60015138	5.53E-45	postive	IKZF1	IGHG1	0.541079935	2.79E-35	postive
FOXP3	CD37	0.5739403	1.95E-40	postive	IKZF1	IGHV2-70	0.586781841	1.30E-42	postive
FOXP3	SIGLEC1	0.591782771	1.74E-43	postive	IKZF1	IGHV4-34	0.550929069	9.12E-37	postive
IRF4	PTGDS	0.550808629	9.52E-37	postive	IKZF1	IL16	0.845401876	5.32E-123	postive
IRF4	CCR7	0.562590949	1.37E-38	postive	IKZF1	TNFRSF13C	0.624781887	1.17E-49	postive
IRF4	CD79B	0.588546252	6.42E-43	postive	IKZF1	PACSIN1	0.540013487	4.01E-35	postive
IRF4	CD19	0.586646721	1.37E-42	postive	IKZF1	C1QC	0.538842792	5.97E-35	postive
IRF4	PLCG2	0.675916416	7.89E-61	postive	IKZF1	C1QB	0.551688504	6.97E-37	postive
IRF4	IGHG1	0.630437298	8.61E-51	postive	IKZF1	C1QA	0.589636237	4.14E-43	postive
IRF4	IGHG4	0.560575898	2.86E-38	postive	IKZF1	CD37	0.781264003	6.44E-93	postive
IRF4	IGHV2-70	0.659954441	4.17E-57	postive	IKZF1	LILRA4	0.579236834	2.54E-41	postive
IRF4	IGHV3-48	0.601991615	2.55E-45	postive	IKZF1	SIGLEC1	0.599702206	6.67E-45	postive
IRF4	IGHV4-31	0.559234064	4.66E-38	postive	LMO2	PTGDS	0.5946097	5.48E-44	postive
IRF4	IGHV4-34	0.721106835	9.03E-73	postive	LMO2	CD79B	0.505542514	2.61E-30	postive
IRF4	IGHV5-51	0.585396358	2.26E-42	postive	LMO2	PLCG2	0.560397645	3.05E-38	postive
IRF4	IGKV1-8	0.639406037	1.23E-52	postive	LMO2	IL16	0.565502757	4.68E-39	postive
IRF4	IGKV1D-8	0.575344043	1.14E-40	postive	LMO2	CD37	0.579442619	2.35E-41	postive
IRF4	IL16	0.766071333	2.92E-87	postive	MAF	SIGLEC1	0.532485439	5.03E-34	postive
IRF4	TNFRSF13C	0.518396899	4.84E-32	postive
IRF4	CD37	0.60732517	2.65E-46	postive
IRF4	LILRA4	0.635212665	9.12E-52	postive
